# Supplementary material for: Dirhodium complexes: determination of absolute configuration by the exciton chirality method using VCD spectroscopy
Source: Royal Society of Chemistry journal article supplement (doi:10.1039/c3dt51567b), 2013-01-01
Supplement: c3dt51567b.pdf [file c3dt51567b.pdf]

## Supporting Information

### Dirhodium complexes: determination of absolute configuration by exciton chirality method using VCD spectroscopy

Gábor Szilvágyi,<sup>a</sup> Balázs Brém,<sup>b</sup> Gábor Báti,<sup>a</sup> László Tölgyesi,<sup>c</sup> Miklós Hollósi,<sup>a</sup> Elemér Vass<sup>a\*</sup>

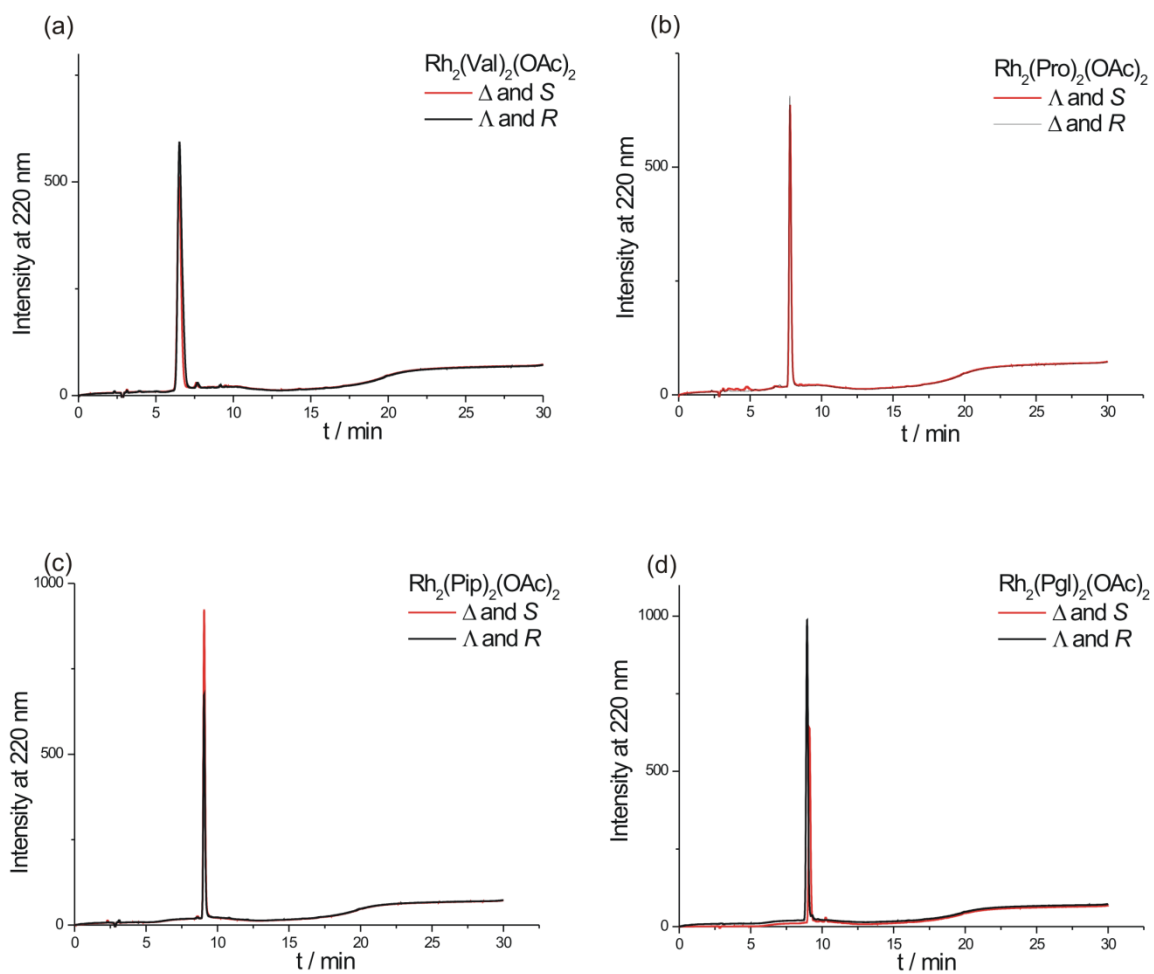

**Figure S1.** The chromatograms of the purified complexes

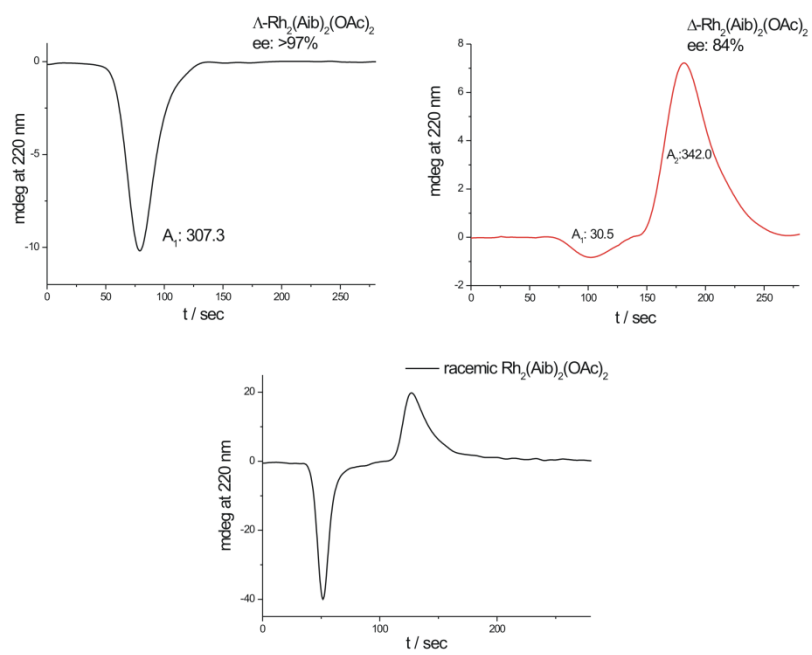

**Figure S2.** Chiral HPLC-CD separation of the  $\text{Rh}_2(\text{Aib})_2(\text{OAc})_2$  complex

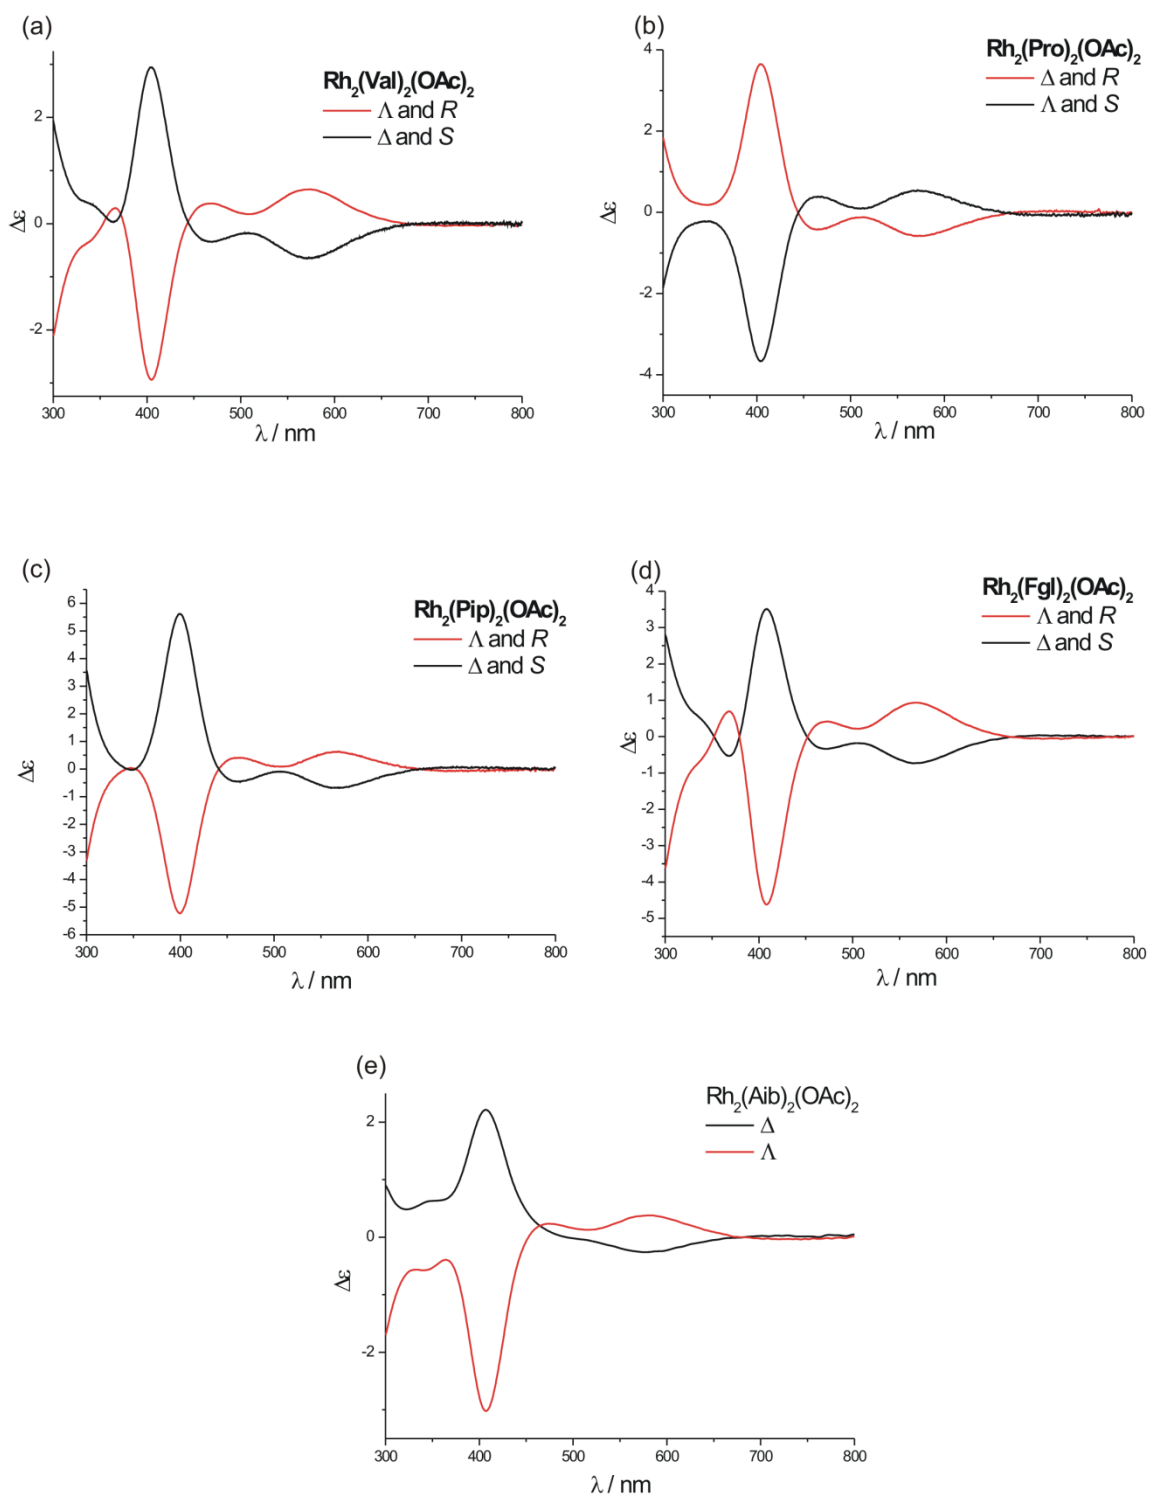

**Figure S3.** ECD spectra of the chiral complexes (solvent: ACN,  $c$ :  $\sim 0.4$  mg/ml, quartz cell of 10 mm).

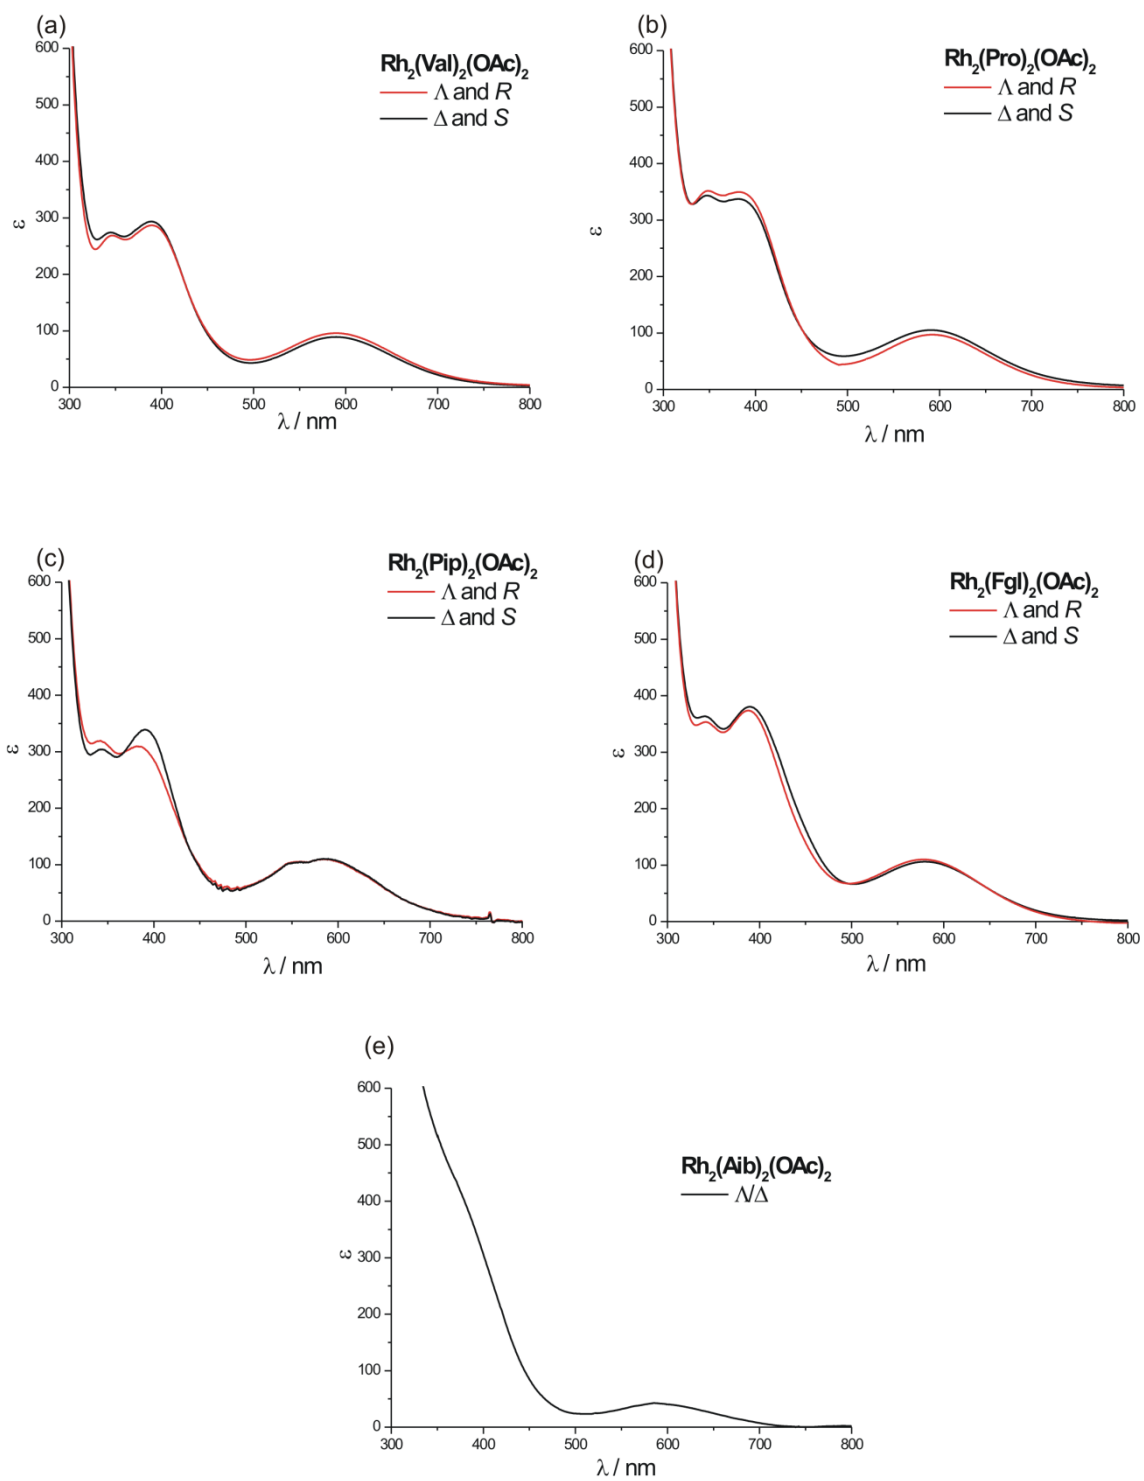

**Figure S4.** UV-vis spectra of the complexes (ACN, quartz cell of 10 mm, Jasco V-660 spectrophotometer )

**Table S1.** UV-vis spectroscopic data of the complexes

| <b>Complex</b>                                        | <b><math>\lambda_{\text{max}}</math> / nm (<math>\epsilon</math> / <math>\text{dm}^3 \cdot \text{mol}^{-1} \cdot \text{cm}^{-1}</math>)</b> |           |           |
|-------------------------------------------------------|---------------------------------------------------------------------------------------------------------------------------------------------|-----------|-----------|
| Rh <sub>2</sub> (Val) <sub>2</sub> (OAc) <sub>2</sub> | 589 (89)                                                                                                                                    | 389 (291) | 346 (272) |
| Rh <sub>2</sub> (Pro) <sub>2</sub> (OAc) <sub>2</sub> | 593 (101)                                                                                                                                   | 382 (342) | 349 (345) |
| Rh <sub>2</sub> (Pip) <sub>2</sub> (OAc) <sub>2</sub> | 582 (108)                                                                                                                                   | 388 (318) | 342 (310) |
| Rh <sub>2</sub> (Fgl) <sub>2</sub> (OAc) <sub>2</sub> | 579 (107)                                                                                                                                   | 390 (376) | 341 (357) |
| Rh <sub>2</sub> (Aib) <sub>2</sub> (OAc) <sub>2</sub> | 587 (43)                                                                                                                                    | shoulder  | shoulder  |

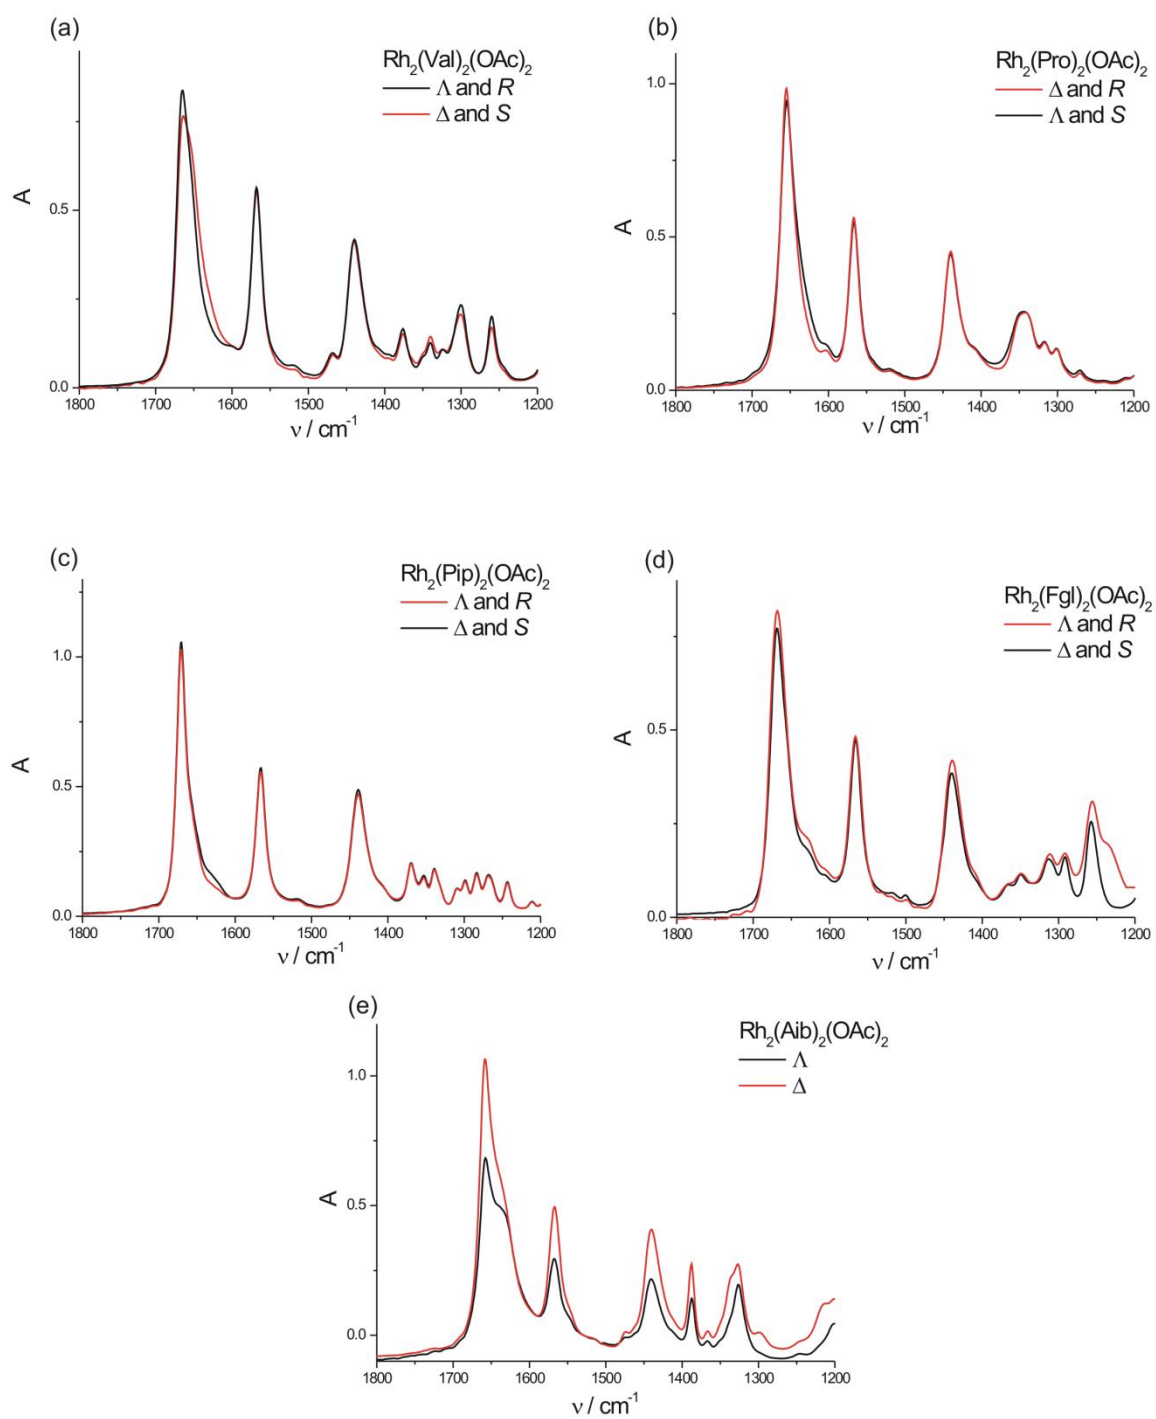

**Figure S5.** The FT-IR spectra of the chiral complexes ( $c$ : 14 mg/ml,  $\text{ACN-d}_3$ ,  $\text{BaF}_2$  cell of 0.207 mm).

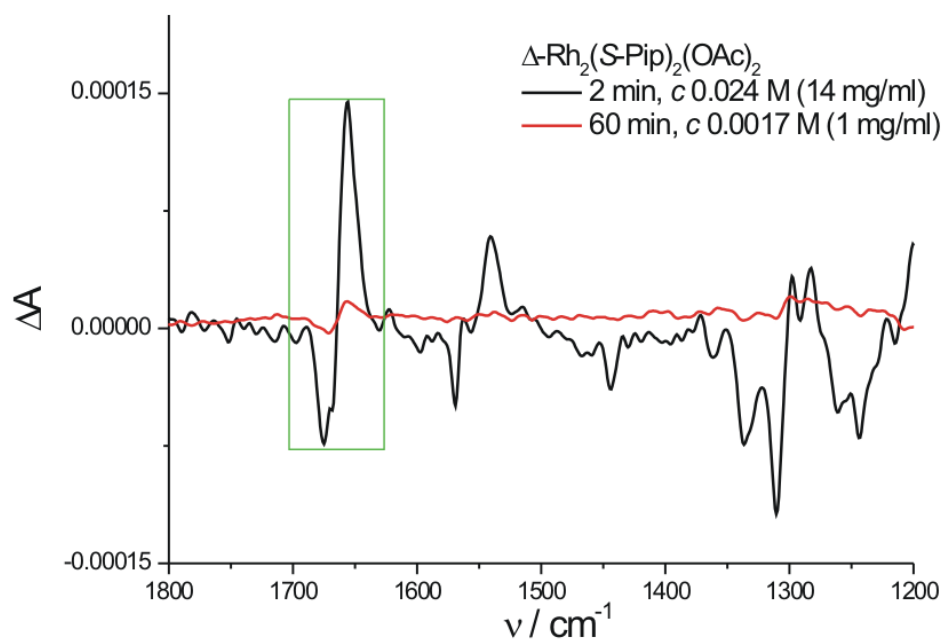

**Figure S6.** Application of the VCD exciton chirality method for a short and a low-concentration measurement (ACN-d<sub>3</sub>, BaF<sub>2</sub> cell of 0.207 mm).

**Table S2.** Results of population analysis

| Compound                                            | Conformer | $\Delta G(\text{kcal/mol})$ | Population |
|-----------------------------------------------------|-----------|-----------------------------|------------|
| $\Delta\text{-Rh}_2(\text{S-Val})_2(\text{OAc})_2$  | A         | 0.000                       | 0.811      |
|                                                     | B         | 0.948                       | 0.163      |
|                                                     | C         | 2.021                       | 0.026      |
| $\Lambda\text{-Rh}_2(\text{S-Pro})_2(\text{OAc})_2$ | A         | 0.000                       | 0.528      |
|                                                     | B         | 0.319                       | 0.307      |
|                                                     | C         | 0.689                       | 0.164      |
| $\Delta\text{-Rh}_2(\text{S-Pip})_2(\text{OAc})_2$  | A         | 0.000                       | 1          |
| $\Delta\text{-Rh}_2(\text{S-Pgl})_2(\text{OAc})_2$  | A         | 0.000                       | 0.947      |
|                                                     | B         | 1.695                       | 0.053      |
| $\Lambda\text{-Rh}_2(\text{Aib})_2(\text{OAc})_2$   | A         | 0.000                       | 1          |

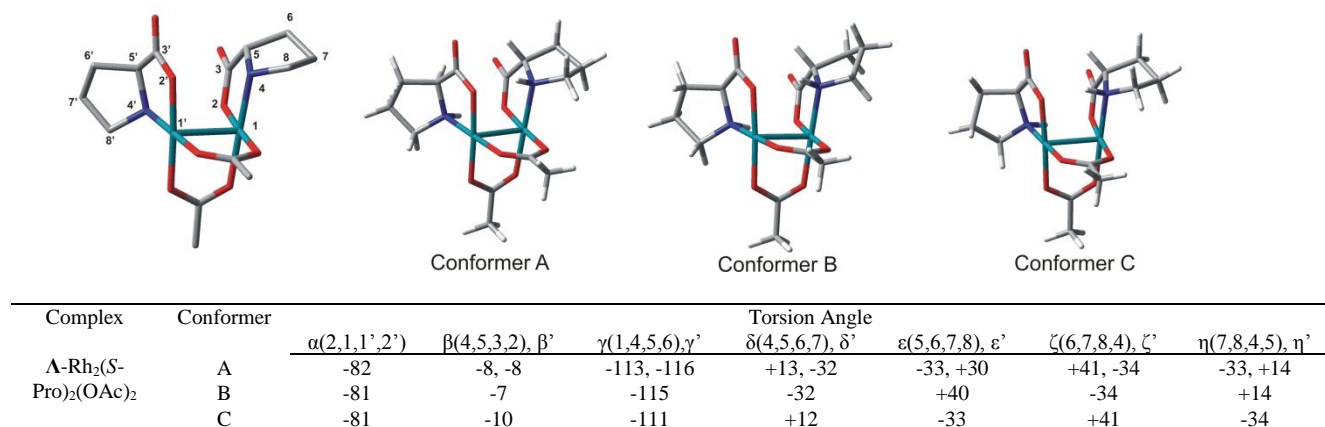

**Figure S7.** Conformers of  $\Lambda$ -Rh<sub>2</sub>(S-Pro)<sub>2</sub>(OAc)<sub>2</sub> complex and their relevant torsion angles

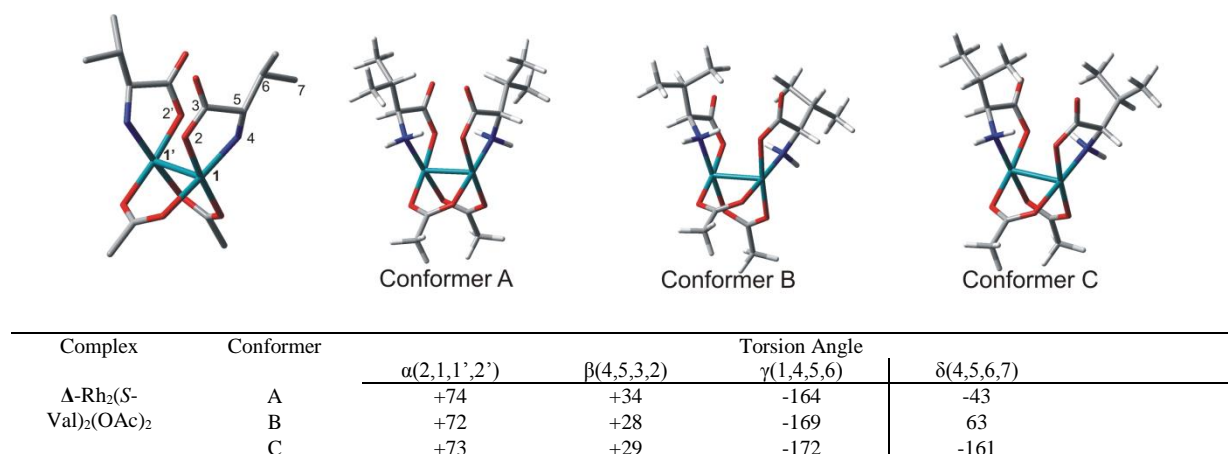

**Figure S8.** Conformers of  $\Lambda$ -Rh<sub>2</sub>(S-Val)<sub>2</sub>(OAc)<sub>2</sub> complex and their relevant torsion angles

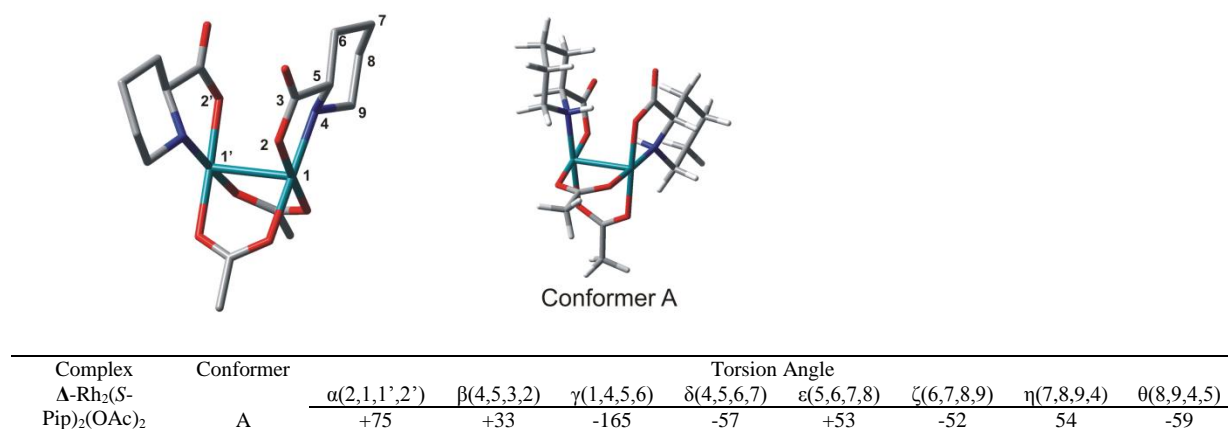

**Figure S9.** Conformer A of  $\Lambda$ -Rh<sub>2</sub>(S-Pip)<sub>2</sub>(OAc)<sub>2</sub> complex and its relevant torsion angles



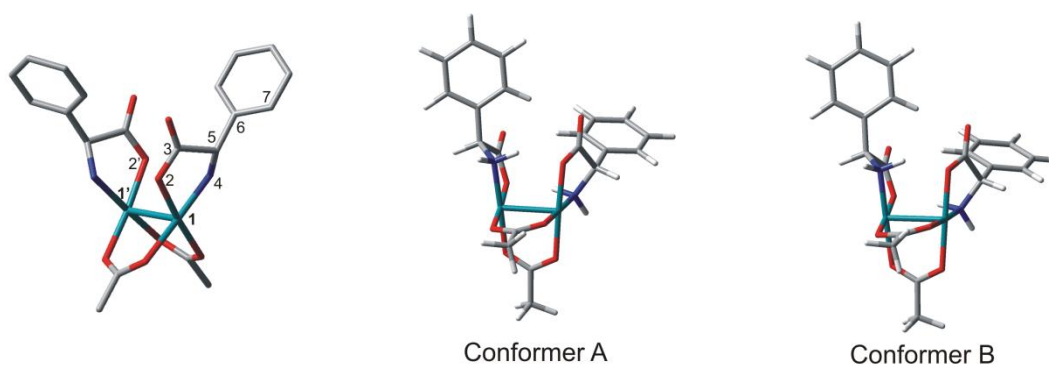

| Complex                                            | Conformer | Torsion Angle       |                  |                   |                   |
|----------------------------------------------------|-----------|---------------------|------------------|-------------------|-------------------|
|                                                    |           | $\alpha(2,1,1',2')$ | $\beta(4,5,3,2)$ | $\gamma(1,4,5,6)$ | $\delta(4,5,6,7)$ |
| $\Delta\text{-Rh}_2(\text{S-Pgl})_2(\text{OAc})_2$ | A         | +69                 | +35              | -172              | -113              |
|                                                    | B         | +66                 | +33              | -172              | -111              |

**Figure S10.** Conformers of  $\Delta\text{-Rh}_2(\text{S-Pgl})_2(\text{OAc})_2$  complex and their relevant torsion angles

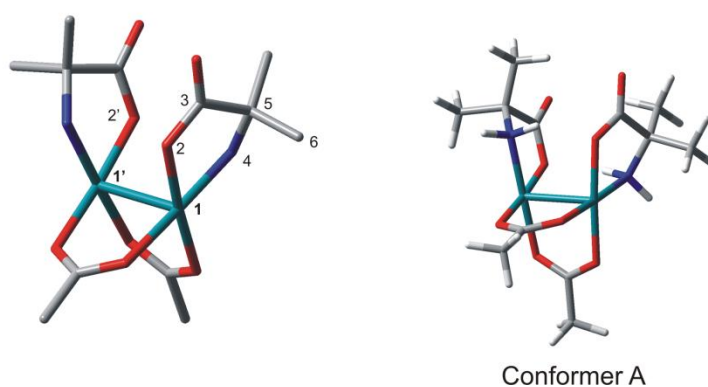

| Complex                                          | Conformer | Torsion Angle       |                  |                   |
|--------------------------------------------------|-----------|---------------------|------------------|-------------------|
|                                                  |           | $\alpha(2,1,1',2')$ | $\beta(4,5,3,2)$ | $\gamma(1,4,5,6)$ |
| $\Delta\text{-Rh}_2(\text{Aib})_2(\text{OAc})_2$ | A         | +74                 | +28              | +83               |

**Figure S11.** Conformer A of  $\Delta\text{-Rh}_2(\text{Aib})_2(\text{OAc})_2$  complex and its relevant torsion angles
